# Supplementary material for: Association of serum albumin level with incidence and mortality of overt hepatic encephalopathy in cirrhosis during hospitalization
Source: PubMed Central journal article supplement — Ther Adv Gastroenterol. 2019 Oct 7;12:1756284819881302. doi: 10.1177/1756284819881302 (PMC6783662; doi:10.1177/1756284819881302), 2019-10-07
Supplement: Supplementary_Table_1.pdf [file Supplementary_Table_1.pdf]

| First Author, Journal (year)                                        | Country        | Study design         | Characteristics of patients            | HE classify | Proportion of HE (HE/All) | Length of follow-up | Results of univariate analysis                                                                                                                                                      | Results of multivariate analysis                                                                |
|---------------------------------------------------------------------|----------------|----------------------|----------------------------------------|-------------|---------------------------|---------------------|-------------------------------------------------------------------------------------------------------------------------------------------------------------------------------------|-------------------------------------------------------------------------------------------------|
| <b>ALB level as a variable</b>                                      |                |                      |                                        |             |                           |                     |                                                                                                                                                                                     |                                                                                                 |
| Zhang, <i>Archives of medical science</i> (2016)                    | China          | Cross-sectional      | Liver cirrhosis                        | Minimal HE  | 43.3% (26/60)             | N/A                 | Small intestinal bacterial overgrowth, Age, Education, NCT-A, NCT-BC, ALB, PT, Ammonia                                                                                              | Age, Education, ALB, Ammonia, Small intestinal bacterial overgrowth                             |
| Greinert, <i>Zeitschrift fur Gastroenterologie</i> (2018)           | Germany        | Cross-sectional      | Liver cirrhosis                        | Covert HE   | 59.8% (70/117)            | N/A                 | Child-Pugh score, MELD score, TBIL, Scr, Na, AST, ALB, PSE, Critical flicker frequency                                                                                              | NA                                                                                              |
| Bhanji, <i>Hepatology international</i> (2018)                      | Canada         | Cross-sectional      | Liver cirrhosis                        | Overt HE    | 19.0% (128/675)           | N/A                 | Alcohol cirrhosis, Na, MELD score, Ascites, Sarcopenia                                                                                                                              | Na, MELD score, Ascites, Sarcopenia                                                             |
| Bale, <i>Journal of clinical and experimental hepatology</i> (2018) | India          | Cross-sectional      | Liver cirrhosis                        | Minimal HE  | 52.2% (94/180)            | N/A                 | TBIL, AST, ALB, INR, Child-Pugh score, MELD score                                                                                                                                   | Child-Pugh score                                                                                |
| Nardelli, <i>Hepatology</i> (2018)                                  | Italy          | Prospective cohort   | Liver cirrhosis                        | Covert HE   | 42.3% (131/310)           | 14.1 months         | Child-Pugh score, MELD score, Previous HE, Ascites, Decompensated cirrhosis, PPIs, ALB, Na, Animal naming test                                                                      | PPI, Previous HE, Na, ALB, Age, MELD score                                                      |
| Tapper, <i>Hepatology</i> (2018)                                    | USA            | Retrospective cohort | Liver cirrhosis                        | Overt HE    | 43.6% (863/1979)          | 5 years             | Ascites, Paracentesis, TBIL, ALB, Na, Opiate, Beta-blocker, Statin                                                                                                                  | TBIL, ALB, Beta-blocker, Statin                                                                 |
| Labenz, <i>The American journal of gastroenterology</i> (2019)      | Germany        | Prospective cohort   | Liver cirrhosis                        | Covert HE   | 38.2% (91/238)            | 6 months            | Outpatient, History of ascites, Clinically detectable ascites, History of overt HE, S-ANT1 score, TBIL, ALB, INR, Fatigue, Systemic symptoms, Activity, Emotional function, Worries | Clinically detectable ascites, History of overt HE, S-ANT1, ALB, Activity subdomain of the CLDQ |
| Hanai, <i>Journal of gastroenterology and hepatology</i> (2019)     | Japan          | Retrospective cohort | Liver cirrhosis                        | Minimal HE  | 20.8% (56/269)            | N/A                 | HCC, Child-Pugh score, MELD score, TBIL, ALB, INR, Ammonia, Branched-chain amino acids/Tyrosine                                                                                     | NA                                                                                              |
| <b>Current study</b>                                                | China          | Retrospective cohort | Liver cirrhosis                        | Overt HE    | 4.8% (113/2376)           | In hospitalizations | Age, Ascites, AUGIB, Infection, Hb, WBC, TBIL, ALB, AST, BUN, Scr, K, Na, Ammonia, PT, APTT, Child-Pugh score, MELD score                                                           | Age, Infection, ALB, Ammonia, PT                                                                |
| <b>ALB level not as a variable</b>                                  |                |                      |                                        |             |                           |                     |                                                                                                                                                                                     |                                                                                                 |
| Guevara, <i>The American journal of gastroenterology</i> (2009)     | Spain          | Prospective cohort   | Liver cirrhosis                        | Overt HE    | 45.9% (28/61)             | 1 year              | Hyponatremia, Na, TBIL, Scr, Diuretic                                                                                                                                               | Hyponatremia, TBIL, Scr, Earlier HE                                                             |
| Guevara, <i>Liver international</i> (2010)                          | Spain          | Retrospective cohort | Liver cirrhosis and refractory ascites | Overt HE    | 38.6% (27/70)             | 1 year              | Hyponatremia, Na, TBIL, Scr, Age                                                                                                                                                    | Hyponatremia, Scr, TBIL                                                                         |
| Kobtan, <i>Biological trace element research</i> (2016) #           | Egypt          | Cross-sectional      | Liver cirrhosis                        | Overt HE    | 62.5% (50/80)             | N/A                 | Serum manganese level                                                                                                                                                               |                                                                                                 |
| Yuan, <i>PloS one</i> (2018)                                        | China (Taiwan) | Case-control         | Liver cirrhosis                        | Overt HE    | N/A                       | N/A                 | SBP, Sepsis, Biliary tract infection                                                                                                                                                | NA                                                                                              |
| Yousif, <i>Internal and emergency medicine</i> (2019) #             | Egypt          | Prospective cohort   | HCV related liver cirrhosis            | Overt HE    | 33.3% (45/135)            | N/A                 | Vitamin D                                                                                                                                                                           |                                                                                                 |

**Supplementary Table 1. Predictors for development of HE.**

**Note:** #: It is not clear whether this study is univariate or multivariate analysis.

**Abbreviations:** HE: hepatic encephalopathy; TBIL: Total Bilirubin; AST: Aspartate amino Transferase; ALB: Albumin; MELD: Model for End-stage Liver Disease; Na: Sodium; S-ANT: Simplified Animal Naming Test; INR: International Normalized Ratio; CLDQ: Chronic Liver Disease Questionnaire; HCC: Hepatocellular Carcinoma; HCV: Hepatic C Virus; AUGIB: Acute Upper Gastrointestinal Bleeding; Scr: Serum Creatinine; K: Potassium; SBP: Spontaneous Bacterial Peritonitis; PT: Prothrombin Time; APTT: Activated Partial Thromboplastin Time; PSE: Portosystemic Encephalopathy Syndrome test; NCT: Number Connection Test; N/A: Not Applicable; NA: Not Available.
