# Supplementary material for: Association of serum albumin level with incidence and mortality of overt hepatic encephalopathy in cirrhosis during hospitalization
Source: PubMed Central journal article supplement — Ther Adv Gastroenterol. 2019 Oct 7;12:1756284819881302. doi: 10.1177/1756284819881302 (PMC6783662; doi:10.1177/1756284819881302), 2019-10-07
Supplement: Supplementary_Table_2.pdf [file Supplementary_Table_2.pdf]

Supplementary Table 2. Predictors for the death of HE

| First Author, Journal (year)                    | Country           | Study design         | Characteristics of patients           | HE classify | Mortality of HE (Death/All) | Length of follow-up | Results of univariate analysis                                                                                                                                                                                    | Results of multivariate analysis                          |
|-------------------------------------------------|-------------------|----------------------|---------------------------------------|-------------|-----------------------------|---------------------|-------------------------------------------------------------------------------------------------------------------------------------------------------------------------------------------------------------------|-----------------------------------------------------------|
| Bustamante, <i>Journal of hepatology</i> (1999) | Spain             | Retrospective cohort | Liver cirrhosis with HE               | Overt HE    | 73.9% (82/111)              | 1 year              | Sex, HBV infection, Maximal grade of HE, Renal/electrolyte disturbances, Diuretic therapy, Ascites, TBIL, AKP, ALB, BUN, Na, K, PT, Child-Pugh score                                                              | Sex, TBIL, AKP, ALB, BUN, K                               |
| Fichet, <i>Journal of critical care</i> (2009)  | France            | Retrospective cohort | Chronic hepatic disease with overt HE | Overt HE    | 58.6% (41/70)               | 1 year              | Simplified acute physiology score, ARF or HRS, Sepsis, ALB, Vasopressor use, Red blood cell transfusion,                                                                                                          | Vasopressor use, ARF or HRS,                              |
| Cordoba, <i>Journal of hepatology</i> (2014)    | Spain             | Prospective cohort   | Liver cirrhosis with HE               | Overt HE    | 42.8% (197/460)             | 1 year              | NA                                                                                                                                                                                                                | Age, TBIL, INR, Creatinine, Na, and HE grade              |
| Jeong, <i>Medicine</i> (2016)                   | Republic of Korea | Retrospective cohort | Alcoholic liver cirrhosis with HE     | Overt HE    | 6.7% (7/105)                | 30 days             | HRS, WBC, INR, TBIL, MELD score, CLIF-SOFA score, SIRS                                                                                                                                                            | CLIF-SOFA score, SIRS                                     |
| Cui, <i>Metabolic brain disease</i> (2019)*     | China             | Retrospective cohort | Liver cirrhosis with HE               | Overt HE    | 67.7% (412/609)             | 3 months            | Age, Severe HE, HBV infection, Ascites, SBP, MELD score, Child-Pugh score, HRS, Hyponatremia, Upper gastrointestinal bleeding, High-protein diet, WBC, RBC, Hb, PLT, TBIL, ALT, AST, Na, Creatinine, BUN, PT, INR | RBC, TBIL, HE grade, HRS, Upper gastrointestinal bleeding |
| <i>Current study</i>                            | China             | Retrospective cohort | Liver cirrhosis with HE               | Overt HE    | 11.0% (20/183)              | In hospitalizations | WBC, TBIL, ALB, AST, BUN, K, APTT, Child-Pugh score, MELD score                                                                                                                                                   | WBC, TBIL, ALB                                            |

Note: \*: In this study, the patients with low serum ALB level were supplemented with HA.

**Abbreviations:** RBC: Red Blood Cell; ACLF: Acute-Chronic Liver Failure; MELD: Model for End-stage Liver Disease; ALB: Albumin; BUN: Blood Urea Nitrogen; TBIL: Total Bilirubin; Hb: Hemoglobin; Na: Sodium; CRP: C-Reactive Protein; ALT: Alanine amino Transferase; AST: Aspartate amino Transferase; PT: Prothrombin Time; PLT: Platelet; WBC: White Blood Cell; SBP: Spontaneous Bacteria Peritonitis; APTT: Activated Partial Thromboplastin Time; ARF: Acute Renal Failure; HRS: Hepatorenal Syndrome, CLIF-SOFA: Chronic Liver Failure-Sequential Organ Failure Assessment; SIRS: Systemic Inflammatory Response Syndrome; NA: Not Available; HA: Human Albumin.
